# Supplementary material for: Chromium removal from industrial wastewater using Phyllostachys pubescens biomass loaded Cu-S nanospheres
Source: publisher site journal article supplement (doi:10.1515/chem-2018-0073), 2018-08-22
Supplement: Supplementary file 1 [file chem-2018-0073_sm.pdf]

# Supplementary Information

# Open Access

Tian Ai, Xiaojun Jiang\*, Qingyu Liu

## Chromium removal from industrial wastewater using *Phyllostachys pubescens* biomass loaded Cu-S nanospheres

The pseudo-first-order adsorption kinetic model:

$$\log(q_e - q_t) = \log q_e - k_1 t$$

where  $k_1$  ( $\text{min}^{-1}$ ) is the rate constant in the pseudo-first-order adsorption process,  $q_e$  ( $\text{mg g}^{-1}$ ) and  $q_t$  ( $\text{mg g}^{-1}$ ) are the amounts of adsorbed Cr(III) or Cr(VI) on Cu-S-PPP-SH at equilibrium and at time  $t$  (min), respectively.  $k_1$  and  $q_e$  can be calculated from the slopes and the intercepts of the plots  $\log(q_e - q_t)$  versus  $t$ .

The pseudo-second-order kinetic model:

$$\frac{t}{q_t} = \frac{1}{k_2 q_e^2} + \frac{t}{q_e}$$

where  $k_2$  ( $\text{g mg}^{-1} \text{min}^{-1}$ ) is the rate constant in the pseudo-second-order adsorption process, and  $k_2$  and  $q_e$  can be calculated from the slopes and the intercepts of the plots  $t / q_t$  versus  $t$ . This model is in agreement with chemical adsorption being the rate-controlling step.

The intra-particle diffusion model to elucidate the diffusion mechanism:

$$q_t = k_{id} t^{0.5} + I$$

where  $k_{id}$  ( $\text{mg g}^{-1} \text{min}^{-0.5}$ ) is the intra-particle diffusion rate constant, and  $I$  ( $\text{mg g}^{-1}$ ) is a constant.  $k_{id}$  and  $I$  ( $\text{mg g}^{-1}$ ) can be calculated from the slopes and the intercepts of the plots  $q_t$  versus  $t^{0.5}$ .

The Langmuir model assumes that the uptake of metal ions occurs on a homogeneous surface by monolayer

adsorption without any interaction between adsorbed ions. The linear form of Langmuir isotherm equation is represented as follows:

$$\frac{C_e}{q_e} = \frac{1}{q_m b} + \frac{C_e}{q_m}$$

where  $C_e$  ( $\text{mg L}^{-1}$ ) is the equilibrium concentration of chromium in solution,  $q_e$  ( $\text{mg g}^{-1}$ ) is the sorption capacity at equilibrium,  $q_m$  ( $\text{mg g}^{-1}$ ) is the maximum sorption capacity of the biosorbent, and  $b$  ( $\text{L mg}^{-1}$ ) is the Langmuir constant termed as apparent energy of adsorption. The values of  $q_m$  and  $b$  can be determined from the slope ( $1/q_m$ ) and intercept ( $1/q_m b$ ) of the linear plots of  $C_e / q_e$  versus  $C_e$ , respectively.

The Freundlich isotherm assumes that the uptake of metal ions occur on a heterogeneous surface by multilayer adsorption and that the amount of adsorbate adsorbed increases infinitely with an increase in concentration. The Freundlich isotherm is expressed by the following empirical equation:

$$q_e = K_F C_e^{1/n}$$

and the logarithmic form of this equation is:

$$\log q_e = \log K_F + \frac{1}{n} \log C_e$$

where  $K_F$  ( $\text{mg}^{(1-1/n)} \text{L}^{1/n} \text{g}^{-1}$ ) is the Freundlich adsorption constant representing the adsorption capacity,  $n$  is an arbitrary constant related to the adsorption intensity, and other parameters are the same as in the Langmuir isotherm. The values of  $K_F$  and  $n$  were calculated from slope ( $1/n$ ) and intercept ( $\log K_F$ ) of the plots  $\log K_F$  versus  $\log C_e$ .

\*Corresponding author: Xiaojun Jiang, School of Chemical Engineering, University of Science and Technology Liaoning, Anshan 114051, PR China, E-mail: asjiangxiaojun@163.com

Tian Ai: School of Chemical Engineering, University of Science and Technology Liaoning, Anshan 114051, PR China

Qingyu Liu: College of Engineering, Shenyang Agricultural University, Shenyang 110161, PR China

Table S1: Constants of pseudo-first-order, pseudo-second-order and intra-particle diffusion models for Cr(III) and Cr(VI) on Cu-S-PPP-SH.

| Model   | Pseudo-first-order        |                       |       | Pseudo-second-order       |                                         |       |                           |                       |        |
|---------|---------------------------|-----------------------|-------|---------------------------|-----------------------------------------|-------|---------------------------|-----------------------|--------|
| Metals  | $q_e$                     | $k_1$                 | $R^2$ | $q_e$                     | $k_2$                                   | $R^2$ |                           |                       |        |
|         | (mg g <sup>-1</sup> )     | (min <sup>-1</sup> )  |       | (mg g <sup>-1</sup> )     | (g mg <sup>-1</sup> min <sup>-1</sup> ) |       |                           |                       |        |
| Cr(III) | 12.31                     | -0.087                | 0.977 | 16.42                     | 0.010                                   | 0.997 |                           |                       |        |
| Cr(VI)  | 14.40                     | -0.042                | 0.964 | 23.05                     | 0.007                                   | 0.999 |                           |                       |        |
| Model   | Intra-particle diffusion  |                       |       |                           |                                         |       |                           |                       |        |
| Metals  | $k_{id1}$                 | $C_1$                 | $R^2$ | $k_{id2}$                 | $C_2$                                   | $R^2$ | $k_{id3}$                 | $C_3$                 | $R^2$  |
|         | (mg g min <sup>-1</sup> ) | (mg g <sup>-1</sup> ) |       | (mg g min <sup>-1</sup> ) | (mg g <sup>-1</sup> )                   |       | (mg g min <sup>-1</sup> ) | (mg g <sup>-1</sup> ) |        |
| Cr(III) | 6.085                     | -2.258                | 0.955 | 0.267                     | 14.106                                  | 0.579 | —                         | −16.670               | −0.958 |
| Cr(VI)  | 2.850                     | 1.614                 | 0.991 | 4.450                     | -0.655                                  | 0.962 | 0.538                     |                       |        |

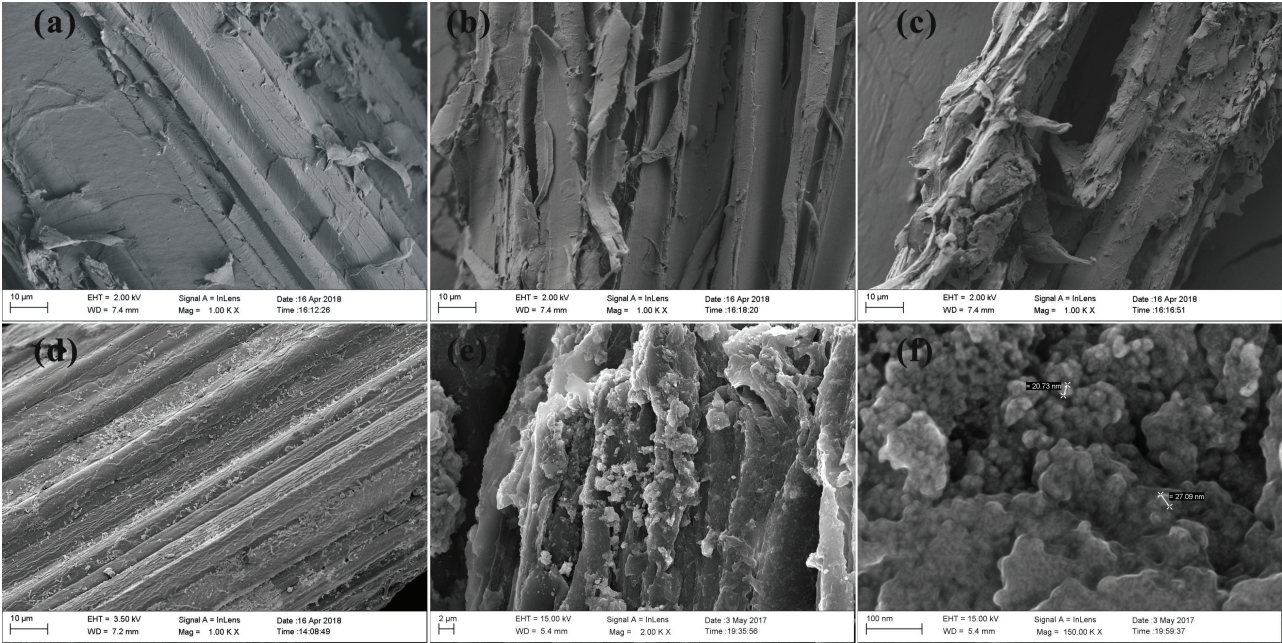

Figure S1: SEM images of (a) PPP, (b) PPP-OH, (c) PPP-SH and (d-f) Cu-S-PPP-SH.

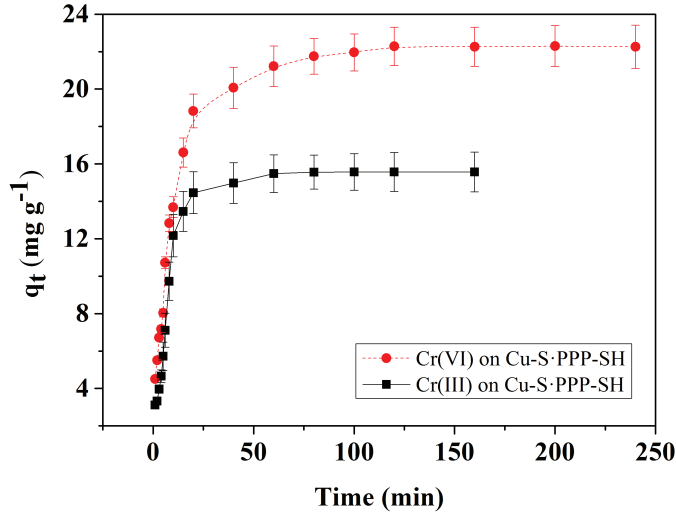

Figure S2: Effect of contact time on adsorption of Cr(III) and Cr(VI) by Cu-S-PPP-SH. Conditions: pH 6.1 and 1.9 for Cr(III) and Cr(VI), initial metal ion concentrations 50  $\text{mg L}^{-1}$ , adsorbent concentrations 2.0  $\text{g L}^{-1}$ , temperature 25  $^{\circ}\text{C}$ .

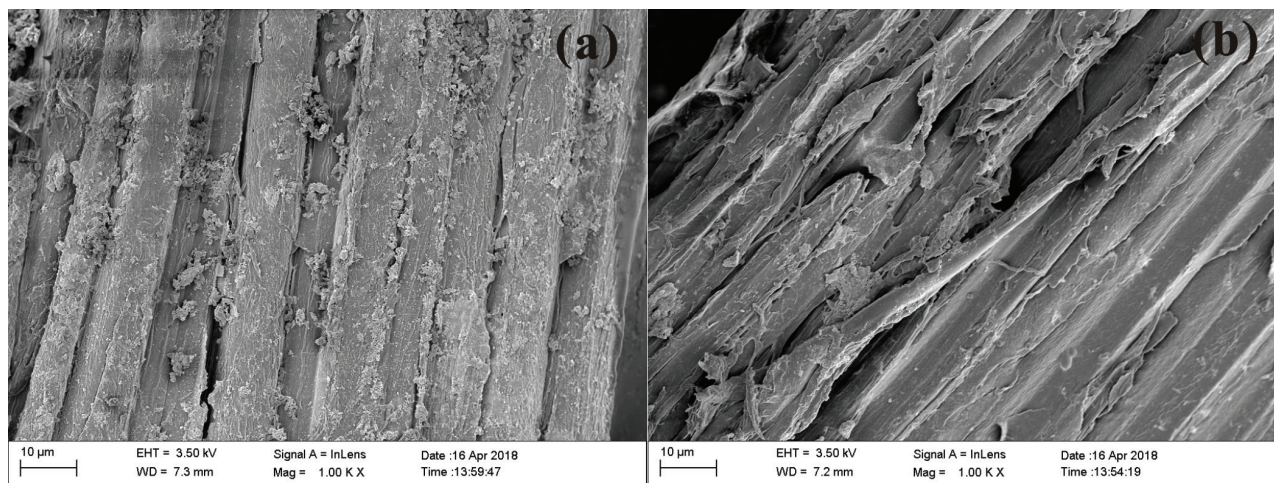

**Figure S3:** SEM images of Cu-S-PPP-SH for the adsorption of (a) Cr(III) and (b) Cr(VI) after repeated use for three times.

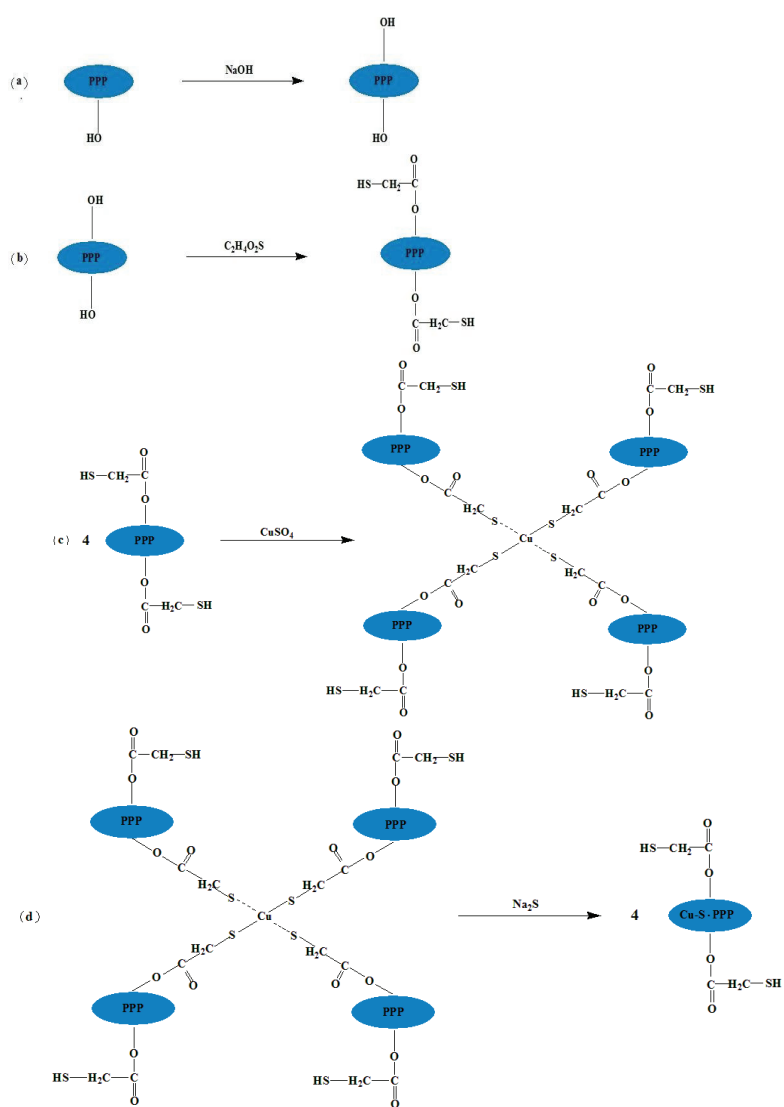

**Scheme S1:** The possible modification mechanism of (a) PPP-OH, (b) PPP-SH, (c) (PPP-S)<sub>2</sub>Cu and (d) Cu-S-PPP-SH.

(a)

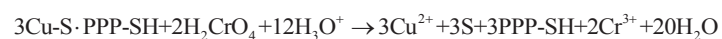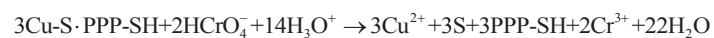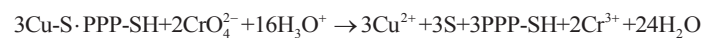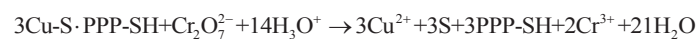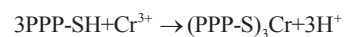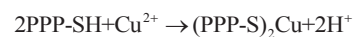

(b)

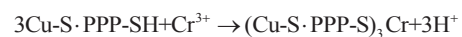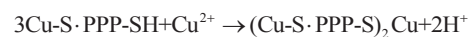

**Scheme S2:** The possible adsorption mechanisms of Cu-S-PPP-SH: (a) Cr(VI) adsorption; (b) Cr(III) adsorption.
